# Supplementary material
Source: MDPI journal article supplement (https://www.mdpi.com/2072-4292/9/2/118)
Supplement: s1 [file s1]

Supplementary Materials: Detection of Archaeological Residues in Vegetated Areas Using Satellite Synthetic Aperture Radar

Christopher Stewart

**Table S1.** Full list of COSMO SkyMed data used for the analysis.

| **Sensor** | **Sensor Mode** | **Acquisition Date** | **Start Time** | **Stop Time** | **Polarisation** | **Pass** | **Scene Center Off-Nadir Angle** | **Antenna Point** | **Record Number** |
| --- | --- | --- | --- | --- | --- | --- | --- | --- | --- |
| SAR3 | SPOTLIGHT ENHANCED | 8 June 2010 | 04:55:42 | 04:55:49 | HH | A | 23240 | right | 100622723 |
| SAR2 | SPOTLIGHT ENHANCED | 9 July 2010 | 04:55:19 | 04:55:26 | HH | A | 23240 | right | 100626084 |
| SAR2 | SPOTLIGHT ENHANCED | 25 July 2010 | 04:55:10 | 04:55:17 | HH | A | 23240 | right | 100627665 |
| SAR3 | SPOTLIGHT ENHANCED | 15 November 2010 | 04:53:51 | 04:53:58 | HH | A | 23240 | right | 100642743 |
| SAR2 | SPOTLIGHT ENHANCED | 30 November 2010 | 04:53:42 | 04:53:49 | HH | A | 23240 | right | 100644987 |
| SAR2 | SPOTLIGHT ENHANCED | 16 December 2010 | 04:53:29 | 04:53:37 | HH | A | 23240 | right | 100648509 |
| SAR2 | SPOTLIGHT ENHANCED | 1 January 2011 | 04:53:18 | 04:53:25 | HH | A | 23240 | right | 100652930 |
| SAR3 | SPOTLIGHT ENHANCED | 2 January 2011 | 04:53:17 | 04:53:24 | HH | A | 23240 | right | 100653048 |
| SAR2 | SPOTLIGHT ENHANCED | 6 March 2011 | 04:52:37 | 04:52:44 | HH | A | 23240 | right | 100661501 |
| SAR3 | SPOTLIGHT ENHANCED | 7 March 2011 | 04:52:36 | 04:52:44 | HH | A | 23240 | right | 100661659 |
| SAR2 | SPOTLIGHT ENHANCED | 23 April 2011 | 04:52:11 | 04:52:19 | HH | A | 23240 | right | 100670008 |
| SAR3 | SPOTLIGHT ENHANCED | 24 April 2011 | 04:52:10 | 04:52:17 | HH | A | 23240 | right | 100670093 |
| SAR2 | SPOTLIGHT ENHANCED | 10 June 2011 | 04:51:40 | 04:51:47 | HH | A | 23240 | right | 100678728 |
| SAR3 | SPOTLIGHT ENHANCED | 11 June 2011 | 04:51:39 | 04:51:46 | HH | A | 23240 | right | 100679027 |
| SAR4 | SPOTLIGHT ENHANCED | 14 June 2011 | 04:51:38 | 04:51:45 | HH | A | 23240 | right | 100679945 |
| SAR1 | SPOTLIGHT ENHANCED | 18 June 2011 | 04:51:35 | 04:51:43 | HH | A | 23240 | right | 100681137 |
| SAR1 | SPOTLIGHT ENHANCED | 8 October 2011 | 04:50:30 | 04:50:37 | HH | A | 23240 | right | 100719868 |
| SAR3 | SPOTLIGHT ENHANCED | 18 November 2011 | 04:50:08 | 04:50:15 | HH | A | 23240 | right | 100735088 |
| SAR2 | SPOTLIGHT ENHANCED | 19 December 2011 | 04:49:52 | 04:49:59 | HH | A | 22250 | right | 100744788 |
| SAR2 | SPOTLIGHT ENHANCED | 4 January 2012 | 04:49:42 | 04:49:50 | HH | A | 23240 | right | 100749856 |
| SAR2 | SPOTLIGHT ENHANCED | 5 February 2012 | 04:49:24 | 04:49:32 | HH | A | 23240 | right | 100760555 |
| SAR2 | SPOTLIGHT ENHANCED | 8 March 2012 | 04:49:07 | 04:49:14 | HH | A | 23240 | right | 100771122 |
| SAR3 | SPOTLIGHT ENHANCED | 29 June 2012 | 04:48:08 | 04:48:16 | HH | A | 23240 | right | 100811691 |
| SAR3 | SPOTLIGHT ENHANCED | 16 August 2012 | 04:47:40 | 04:47:47 | HH | A | 23240 | right | 100829126 |
| SAR2 | SPOTLIGHT ENHANCED | 23 June 2010 | 04:55:32 | 04:55:39 | VV | A | 23240 | right | 100624471 |
| SAR3 | SPOTLIGHT ENHANCED | 24 June 2010 | 04:55:31 | 04:55:38 | VV | A | 23240 | right | 100624544 |
| SAR3 | SPOTLIGHT ENHANCED | 26 July 2010 | 04:55:09 | 04:55:16 | VV | A | 23240 | right | 100627762 |
| SAR3 | STRIPMAP HIMAGE | 10 January 2010 | 05:03:25 | 05:04:01 | HH | A | 30620 | right | 100606401 |
| SAR2 | STRIPMAP HIMAGE | 4 July 2010 | 05:01:25 | 05:01:33 | HH | A | 30620 | right | 100625564 |
| SAR1 | STRIPMAP HIMAGE | 12 July 2010 | 05:01:19 | 05:01:26 | HH | A | 30620 | right | 100626364 |
| SAR3 | STRIPMAP HIMAGE | 21 July 2010 | 05:01:14 | 05:01:21 | HH | A | 30620 | right | 100627282 |
| SAR1 | STRIPMAP HIMAGE | 28 July 2010 | 05:01:09 | 05:01:17 | HH | A | 30620 | right | 100627965 |
| SAR2 | STRIPMAP HIMAGE | 5 August 2010 | 05:01:04 | 05:01:12 | HH | A | 30620 | right | 100628743 |
| SAR1 | STRIPMAP HIMAGE | 13 August 2010 | 05:00:57 | 05:01:04 | HH | A | 30620 | right | 100629586 |
| SAR3 | STRIPMAP HIMAGE | 7 September 2010 | 05:00:41 | 05:00:49 | HH | A | 30620 | right | 100632306 |
| SAR2 | STRIPMAP HIMAGE | 22 September 2010 | 05:00:30 | 05:00:38 | HH | A | 30620 | right | 100635543 |
| SAR3 | STRIPMAP HIMAGE | 9 October 2010 | 05:00:20 | 05:00:27 | HH | A | 30620 | right | 100637986 |
| SAR3 | STRIPMAP HIMAGE | 25 October 2010 | 05:00:11 | 05:00:18 | HH | A | 30620 | right | 100639965 |
| SAR4 | STRIPMAP HIMAGE | 21 March 2011 | 04:58:34 | 04:58:41 | HH | A | 30620 | right |  |
| SAR4 | STRIPMAP HIMAGE | 6 April 2011 | 04:58:25 | 04:58:32 | HH | A | 30620 | right |  |
| SAR4 | STRIPMAP HIMAGE | 22 April 2011 | 04:58:07 | 04:59:48 | HH | A | 30620 | right | 100669910 |
| SAR4 | STRIPMAP HIMAGE | 8 May 2011 | 04:57:54 | 04:59:35 | HH | A | 30620 | right | 100671954 |
| SAR4 | STRIPMAP HIMAGE | 24 May 2011 | 04:57:47 | 04:59:28 | HH | A | 30620 | right | 100674613 |
| SAR4 | STRIPMAP HIMAGE | 9 June 2011 | 04:57:33 | 04:59:15 | HH | A | 30620 | right | 100678507 |
| SAR4 | STRIPMAP HIMAGE | 25 June 2011 | 04:57:26 | 04:59:07 | HH | A | 30620 | right | 100683633 |
| SAR4 | STRIPMAP HIMAGE | 11 July 2011 | 04:57:17 | 04:58:58 | HH | A | 30620 | right | 100688541 |
| SAR4 | STRIPMAP HIMAGE | 28 August 2011 | 04:56:57 | 04:57:04 | HH | A | 30620 | right | 100705151 |
| SAR3 | STRIPMAP HIMAGE | 10 September 2011 | 04:56:51 | 04:56:58 | HH | A | 30620 | right |  |
| SAR4 | STRIPMAP HIMAGE | 13 September 2011 | 04:56:46 | 04:56:53 | HH | A | 30620 | right | 100710891 |
| SAR4 | STRIPMAP HIMAGE | 29 September 2011 | 04:56:37 | 04:56:44 | HH | A | 30620 | right | 100716702 |
| SAR4 | STRIPMAP HIMAGE | 15 October 2011 | 04:56:21 | 04:58:02 | HH | A | 30620 | right | 100723007 |
| SAR4 | STRIPMAP HIMAGE | 16 November 2011 | 04:56:11 | 04:56:19 | HH | A | 30620 | right | 100734549 |
| SAR4 | STRIPMAP HIMAGE | 3 January 2012 | 04:55:44 | 04:55:52 | HH | A | 30620 | right | 100749475 |
| SAR4 | STRIPMAP HIMAGE | 19 January 2012 | 04:55:28 | 04:57:09 | HH | A | 30620 | right | 100755051 |
| SAR4 | STRIPMAP HIMAGE | 4 February 2012 | 04:55:18 | 04:56:59 | HH | A | 30620 | right | 100760269 |
| SAR4 | STRIPMAP HIMAGE | 20 February 2012 | 04:55:07 | 04:56:49 | HH | A | 30620 | right | 100765859 |
| SAR4 | STRIPMAP HIMAGE | 7 March 2012 | 04:55:02 | 04:56:43 | HH | A | 30620 | right | 100770819 |
| SAR4 | STRIPMAP HIMAGE | 23 March 2012 | 04:54:54 | 04:56:35 | HH | A | 30620 | right | 100776135 |
| SAR4 | STRIPMAP HIMAGE | 8 April 2012 | 04:54:43 | 04:56:25 | HH | A | 30620 | right | 100781869 |
| SAR4 | STRIPMAP HIMAGE | 10 May 2012 | 04:54:29 | 04:56:11 | HH | A | 30620 | right | 100793801 |
| SAR1 | STRIPMAP HIMAGE | 15 June 2012 | 04:54:07 | 04:55:48 | HH | A | 30620 | right | 100806699 |
| SAR2 | STRIPMAP HIMAGE | 23 June 2012 | 04:54:04 | 04:55:45 | HH | A | 30620 | right | 100809831 |
| SAR2 | STRIPMAP HIMAGE | 9 July 2012 | 04:53:53 | 04:55:34 | HH | A | 30620 | right | 100815377 |
| SAR2 | STRIPMAP HIMAGE | 25 July 2012 | 04:53:46 | 04:55:27 | HH | A | 30620 | right | 100821293 |
| SAR2 | STRIPMAP HIMAGE | 10 August 2012 | 04:53:38 | 04:55:19 | HH | A | 30620 | right | 100827266 |
| SAR2 | STRIPMAP HIMAGE | 26 August 2012 | 04:53:31 | 04:55:12 | HH | A | 30620 | right | 100833047 |
| SAR2 | STRIPMAP HIMAGE | 11 September 2012 | 04:53:23 | 04:55:04 | HH | A | 30620 | right | 100838564 |
| SAR4 | STRIPMAP HIMAGE | 1 October 2012 | 04:53:15 | 04:54:57 | HH | A | 30620 | right | 100845858 |
| SAR2 | STRIPMAP HIMAGE | 13 October 2012 | 04:53:10 | 04:54:51 | HH | A | 30620 | right | 100850285 |
| SAR2 | STRIPMAP HIMAGE | 29 October 2012 | 04:53:01 | 04:54:42 | HH | A | 30620 | right | 100858087 |
| SAR4 | STRIPMAP HIMAGE | 20 December 2012 | 04:52:37 | 04:54:18 | HH | A | 30620 | right | 100876653 |
| SAR2 | STRIPMAP HIMAGE | 17 January 2013 | 04:52:20 | 04:54:01 | HH | A | 30620 | right | 100886746 |
| SAR2 | STRIPMAP HIMAGE | 2 February 2013 | 04:52:16 | 04:53:57 | HH | A | 30620 | right | 100893145 |
| SAR2 | STRIPMAP HIMAGE | 18 February 2013 | 04:52:05 | 04:53:46 | HH | A | 30620 | right | 100899699 |
| SAR2 | STRIPMAP HIMAGE | 6 March 2013 | 04:52:02 | 04:53:43 | HH | A | 30620 | right | 100906209 |
| SAR2 | STRIPMAP HIMAGE | 22 March 2013 | 04:51:53 | 04:53:35 | HH | A | 30620 | right | 100913450 |
| SAR2 | STRIPMAP HIMAGE | 7 April 2013 | 04:51:46 | 04:53:27 | HH | A | 30620 | right | 100920251 |
| SAR2 | STRIPMAP HIMAGE | 9 May 2013 | 04:51:34 | 04:53:15 | HH | A | 30620 | right | 100934098 |
| SAR2 | STRIPMAP HIMAGE | 10 June 2013 | 04:51:21 | 04:53:02 | HH | A | 30620 | right | 100946788 |
| SAR2 | STRIPMAP HIMAGE | 28 July 2013 | 04:51:01 | 04:52:42 | HH | A | 30620 | right | 100966231 |
| SAR2 | STRIPMAP HIMAGE | 1 November 2013 | 04:50:27 | 04:52:08 | HH | A | 30620 | right | 101009306 |
| SAR2 | STRIPMAP HIMAGE | 17 November 2013 | 04:50:20 | 04:52:01 | HH | A | 30620 | right | 101016322 |
| SAR4 | STRIPMAP HIMAGE | 8 January 2014 | 04:50:03 | 04:51:44 | HH | A | 30620 | right | 101038158 |
| SAR2 | STRIPMAP HIMAGE | 5 February 2014 | 04:49:57 | 04:50:14 | HH | A | 30620 | right | 101050398 |
| SAR4 | STRIPMAP HIMAGE | 9 February 2014 | 04:49:51 | 04:51:32 | HH | A | 30620 | right | 101051632 |
| SAR4 | STRIPMAP HIMAGE | 13 March 2014 | 04:49:42 | 04:51:24 | HH | A | 30620 | right | 101064139 |
| SAR2 | STRIPMAP HIMAGE | 10 April 2014 | 04:49:36 | 04:51:17 | HH | A | 30620 | right | 101074978 |
| SAR2 | STRIPMAP HIMAGE | 12 May 2014 | 04:49:28 | 04:51:09 | HH | A | 30620 | right | 101087418 |
| SAR2 | STRIPMAP HIMAGE | 28 May 2014 | 04:49:20 | 04:51:01 | HH | A | 30620 | right | 101092186 |
| SAR2 | STRIPMAP HIMAGE | 13 June 2014 | 04:49:18 | 04:50:59 | HH | A | 30620 | right | 101096615 |
| SAR2 | STRIPMAP HIMAGE | 29 June 2014 | 04:49:11 | 04:50:51 | HH | A | 30620 | right | 101101021 |
| SAR2 | STRIPMAP HIMAGE | 31 July 2014 | 04:49:06 | 04:50:46 | HH | A | 30620 | right | 101111010 |
| SAR2 | STRIPMAP HIMAGE | 1 September 2014 | 04:48:55 | 04:50:36 | HH | A | 30620 | right | 101121897 |
| SAR2 | STRIPMAP HIMAGE | 17 September 2014 | 04:48:52 | 04:50:33 | HH | A | 30620 | right | 101126759 |
| SAR2 | STRIPMAP HIMAGE | 3 October 2014 | 04:48:49 | 04:50:30 | HH | A | 30620 | right | 101132044 |
| SAR2 | STRIPMAP HIMAGE | 19 October 2014 | 04:48:47 | 04:50:28 | HH | A | 30620 | right | 101136371 |
| SAR2 | STRIPMAP HIMAGE | 4 November 2014 | 04:48:44 | 04:50:25 | HH | A | 30620 | right | 101140450 |
| SAR2 | STRIPMAP HIMAGE | 6 December 2014 | 04:48:37 | 04:50:18 | HH | A | 30620 | right | 101150845 |
| SAR2 | STRIPMAP HIMAGE | 22 December 2014 | 04:48:34 | 04:50:15 | HH | A | 30620 | right | 101155944 |
| SAR4 | STRIPMAP HIMAGE | 11 January 2015 | 04:48:31 | 04:50:12 | HH | A | 30620 | right | 101161085 |
| SAR4 | STRIPMAP HIMAGE | 27 January 2015 | 04:48:25 | 04:50:06 | HH | A | 30620 | right | 101166478 |
| SAR4 | STRIPMAP HIMAGE | 12 February 2015 | 04:48:25 | 04:50:07 | HH | A | 30620 | right | 101175533 |
| SAR4 | STRIPMAP HIMAGE | 28 February 2015 | 04:48:22 | 04:50:04 | HH | A | 30620 | right | 101187445 |
| SAR4 | STRIPMAP HIMAGE | 6 July 2015 | 04:48:07 | 04:49:49 | HH | A | 30620 | right | 101246874 |

© 2017 by the authors. Submitted for possible open access publication under the terms and conditions of the Creative Commons Attribution (CC BY) license (http://creativecommons.org/licenses/by/4.0/).
